# Supplementary material for: Neural network features distinguish chemosensory stimuli in Caenorhabditis elegans
Source: PLoS Comput Biol. 2021 Nov 9;17(11):e1009591. doi: 10.1371/journal.pcbi.1009591 (PMC8604368; doi:10.1371/journal.pcbi.1009591)
Supplement: S21 Table — Performance achieved by logistic regression classifier on a specific classification task–namely, correctly classify responses based on the graph features computed for the first pulse of a stimulus session given a certain time bin and NMI bin. The nested leave-one-out cross validation accuracy, the mean and standard deviation of the accuracies of a null distribution built using 100 permutations of the labels, and the corresponding p-value, or relative position of its accuracy in the null distribution, are all listed. We only used non-standardized graph features computed on the Whole Network. Values in red attained significantly above-chance accuracies, and those in bold red did so in Data Sets 1 and 2. Some tasks did not exceed chance (e.g., time bin 15 x NMI bin 0.05), and this is indicated by a dashed line to indicate that no permutation testing was conducted. Chance is 20%. (DOCX) [file pcbi.1009591.s035.docx]

| Time bin (seconds) | NMI bin | Accuracy (%) | Permutation score (%, mean±s.d.) | p-value |
| --- | --- | --- | --- | --- |
| 15 | 0.05 | 20 | - | - |
| 0.1 | 23 | 15±9 | 0.2475 |
| 0.2 | 20 | - | - |
| 23 | 0.05 | 30 | 14±8 | 0.0594 |
| 0.1 | 17 | - | - |
| 0.2 | 13 | - | - |
| 30 | **0.05** | **33** | **14±8** | **0.0198** |
| 0.1 | 33 | 14±9 | 0.0693 |
| 0.2 | 23 | 13±8 | 0.1287 |
